# Supplementary material for: Truncated FGFR2 is a clinically actionable oncogene in multiple cancers
Source: PubMed Central journal article supplement (PMC9436779; doi:10.1038/s41586-022-05066-5), 2022-08-10
Supplement: 41586_2022_5066_MOESM1_ESM.pdf [file 41586_2022_5066_MOESM1_ESM.pdf]

---

**Supplementary information**

---

**Truncated *FGFR2* is a clinically actionable oncogene in multiple cancers**

---

In the format provided by the authors and unedited

**“Truncated *FGFR2* is a clinically actionable oncogene in multiple cancers”**

Daniel Zingg<sup>1,2,22</sup>, Jinhyuk Bhin<sup>1,2,3,22</sup>, Julia Yemelyanenko<sup>1,2,22</sup>, Sjors M. Kas<sup>1,2,22</sup>, Frank Rolfs<sup>1,2,4</sup>, Catrin Lutz<sup>1,2</sup>, Jessica K. Lee<sup>5</sup>, Sjoerd Klarenbeek<sup>6</sup>, Ian M. Silverman<sup>7</sup>, Stefano Annunziato<sup>1,2</sup>, Chang S. Chan<sup>8,9</sup>, Sander R. Piersma<sup>4</sup>, Timo Eijkman<sup>1,2</sup>, Madelon Badoux<sup>1,2</sup>, Ewa Gogola<sup>1,2</sup>, Bjørn Siteur<sup>10</sup>, Justin Sprengers<sup>10</sup>, Bim de Klein<sup>1,2</sup>, Richard R. de Goeij-de Haas<sup>4</sup>, Gregory M. Riedlinger<sup>9,11</sup>, Hua Ke<sup>8,9</sup>, Russell Madison<sup>5</sup>, Anne Paulien Drenth<sup>1,2</sup>, Eline van der Burg<sup>1,2</sup>, Eva Schut<sup>1,2</sup>, Linda Henneman<sup>1,2,10</sup>, Martine H. van Miltenburg<sup>1,2</sup>, Natalie Proost<sup>10</sup>, Huiling Zhen<sup>12</sup>, Ellen Wientjens<sup>1,2</sup>, Roebi de Bruijn<sup>1,2,3</sup>, Julian R. de Rooter<sup>1,2,3</sup>, Ute Boon<sup>1,2</sup>, Renske de Korte-Grimmerink<sup>10</sup>, Bastiaan van Gerwen<sup>10</sup>, Luis Féliz<sup>13</sup>, Ghassan K. Abou-Alfa<sup>14,15</sup>, Jeffrey S. Ross<sup>5,16</sup>, Marieke van de Ven<sup>10</sup>, Sven Rottenberg<sup>1,17,18</sup>, Edwin Cuppen<sup>2,19,20</sup>, Anne Vaslin Chessex<sup>21</sup>, Siraj M. Ali<sup>5</sup>, Timothy C. Burn<sup>7</sup>, Connie R. Jimenez<sup>4</sup>, Shridar Ganesan<sup>8,9,\*</sup>, Lodewyk F. A. Wessels<sup>2,3,\*</sup> & Jos Jonkers<sup>1,2,\*</sup>

<sup>1</sup> Division of Molecular Pathology, Netherlands Cancer Institute, Amsterdam, The Netherlands.

<sup>2</sup> Oncode Institute, Utrecht, The Netherlands.

<sup>3</sup> Division of Molecular Carcinogenesis, Netherlands Cancer Institute, Amsterdam, The Netherlands.

<sup>4</sup> OncoProteomics Laboratory, Department Medical Oncology, Cancer Center Amsterdam, Amsterdam UMC, Vrije Universiteit Amsterdam, Amsterdam, The Netherlands.

<sup>5</sup> Foundation Medicine, Inc., Cambridge, MA, USA.

<sup>6</sup> Experimental Animal Pathology, Netherlands Cancer Institute, Amsterdam, The Netherlands.

<sup>7</sup> Incyte Research Institute, Wilmington, DE, USA.

<sup>8</sup> Department of Medicine, Division of Medical Oncology, Rutgers Cancer Institute of New Jersey, New Brunswick, NJ, USA.

<sup>9</sup> Rutgers University, Piscataway, NJ, USA.

<sup>10</sup> Mouse Clinic for Cancer and Aging, Netherlands Cancer Institute, Amsterdam, The Netherlands.

<sup>11</sup> Department of Pathology, Rutgers Cancer Institute of New Jersey, New Brunswick, NJ, USA.

<sup>12</sup> Incyte Corporation, Wilmington, DE, USA.

<sup>13</sup> Incyte Biosciences International Sàrl, Morges, Switzerland.

<sup>14</sup> Department of Medicine, Memorial Sloan Kettering Cancer Center, New York, NY, USA.

<sup>15</sup> Department of Medicine, Weill Medical College at Cornell University, New York, NY, USA.

<sup>16</sup> Upstate Medical University, Syracuse, NY, USA.

<sup>17</sup> Institute of Animal Pathology, Vetsuisse Faculty, University of Bern, Bern, Switzerland.

<sup>18</sup> Bern Center for Precision Medicine, University of Bern, Bern, Switzerland.

<sup>19</sup> Hartwig Medical Foundation, Amsterdam, The Netherlands.

<sup>20</sup> Center for Molecular Medicine, University Medical Center Utrecht, Utrecht, The Netherlands.

<sup>21</sup> Debiopharm International SA, Lausanne, Switzerland.

<sup>22</sup> These authors contributed equally: Daniel Zingg, Jinhyuk Bhin, Julia Yemelyanenko, Sjors M. Kas.

\* e-mail: ganesash@cinj.rutgers.edu; l.wessels@nki.nl; j.jonkers@nki.nl

|                                   |                                                                                                 |     |
|-----------------------------------|-------------------------------------------------------------------------------------------------|-----|
| Supplementary Figure 1:           | Uncropped Western blots related to Extended Data Figs. 5g, 7g.....                              | 3-4 |
| Supplementary Figure 2:           | FACS gating strategies related to Extended Data Figs. 5a, 6b, c .....                           | 5-6 |
| Legend for Supplementary Table 1: | List of <i>FGFR2</i> REs identified in the HMF cohort.....                                      | 7   |
| Legend for Supplementary Table 2: | List of <i>FGFR2</i> alterations identified in the FMI cohort .....                             | 7   |
| Legend for Supplementary Table 3: | List of samples expressing <i>FGFR2</i> <sup>AE18</sup> variants identified in TCGA cohort..... | 7   |
| Legend for Supplementary Table 4: | Expression of lentiviral <i>FGFR2</i> constructs .....                                          | 7   |
| Legend for Supplementary Table 5: | List of <i>FGF/FGFR</i> alterations identified in CCLE cell lines with FGFRi responses .....    | 7   |
| Legend for Supplementary Table 6: | List of <i>FGF/FGFR</i> alterations identified in PDX models with Debio-1347 response.....      | 8   |
| Supplementary Table 7:            | <i>Fgfr2</i> GEMM cloning primer sequences .....                                                | 8   |
| Supplementary Table 8:            | Mouse genotyping primer sequences.....                                                          | 8   |
| Supplementary Table 9:            | Antibodies used.....                                                                            | 8   |
| Supplementary Table 10:           | siRNA sequences .....                                                                           | 9   |
| Supplementary Table 11:           | RT-qPCR primer sequences.....                                                                   | 9   |

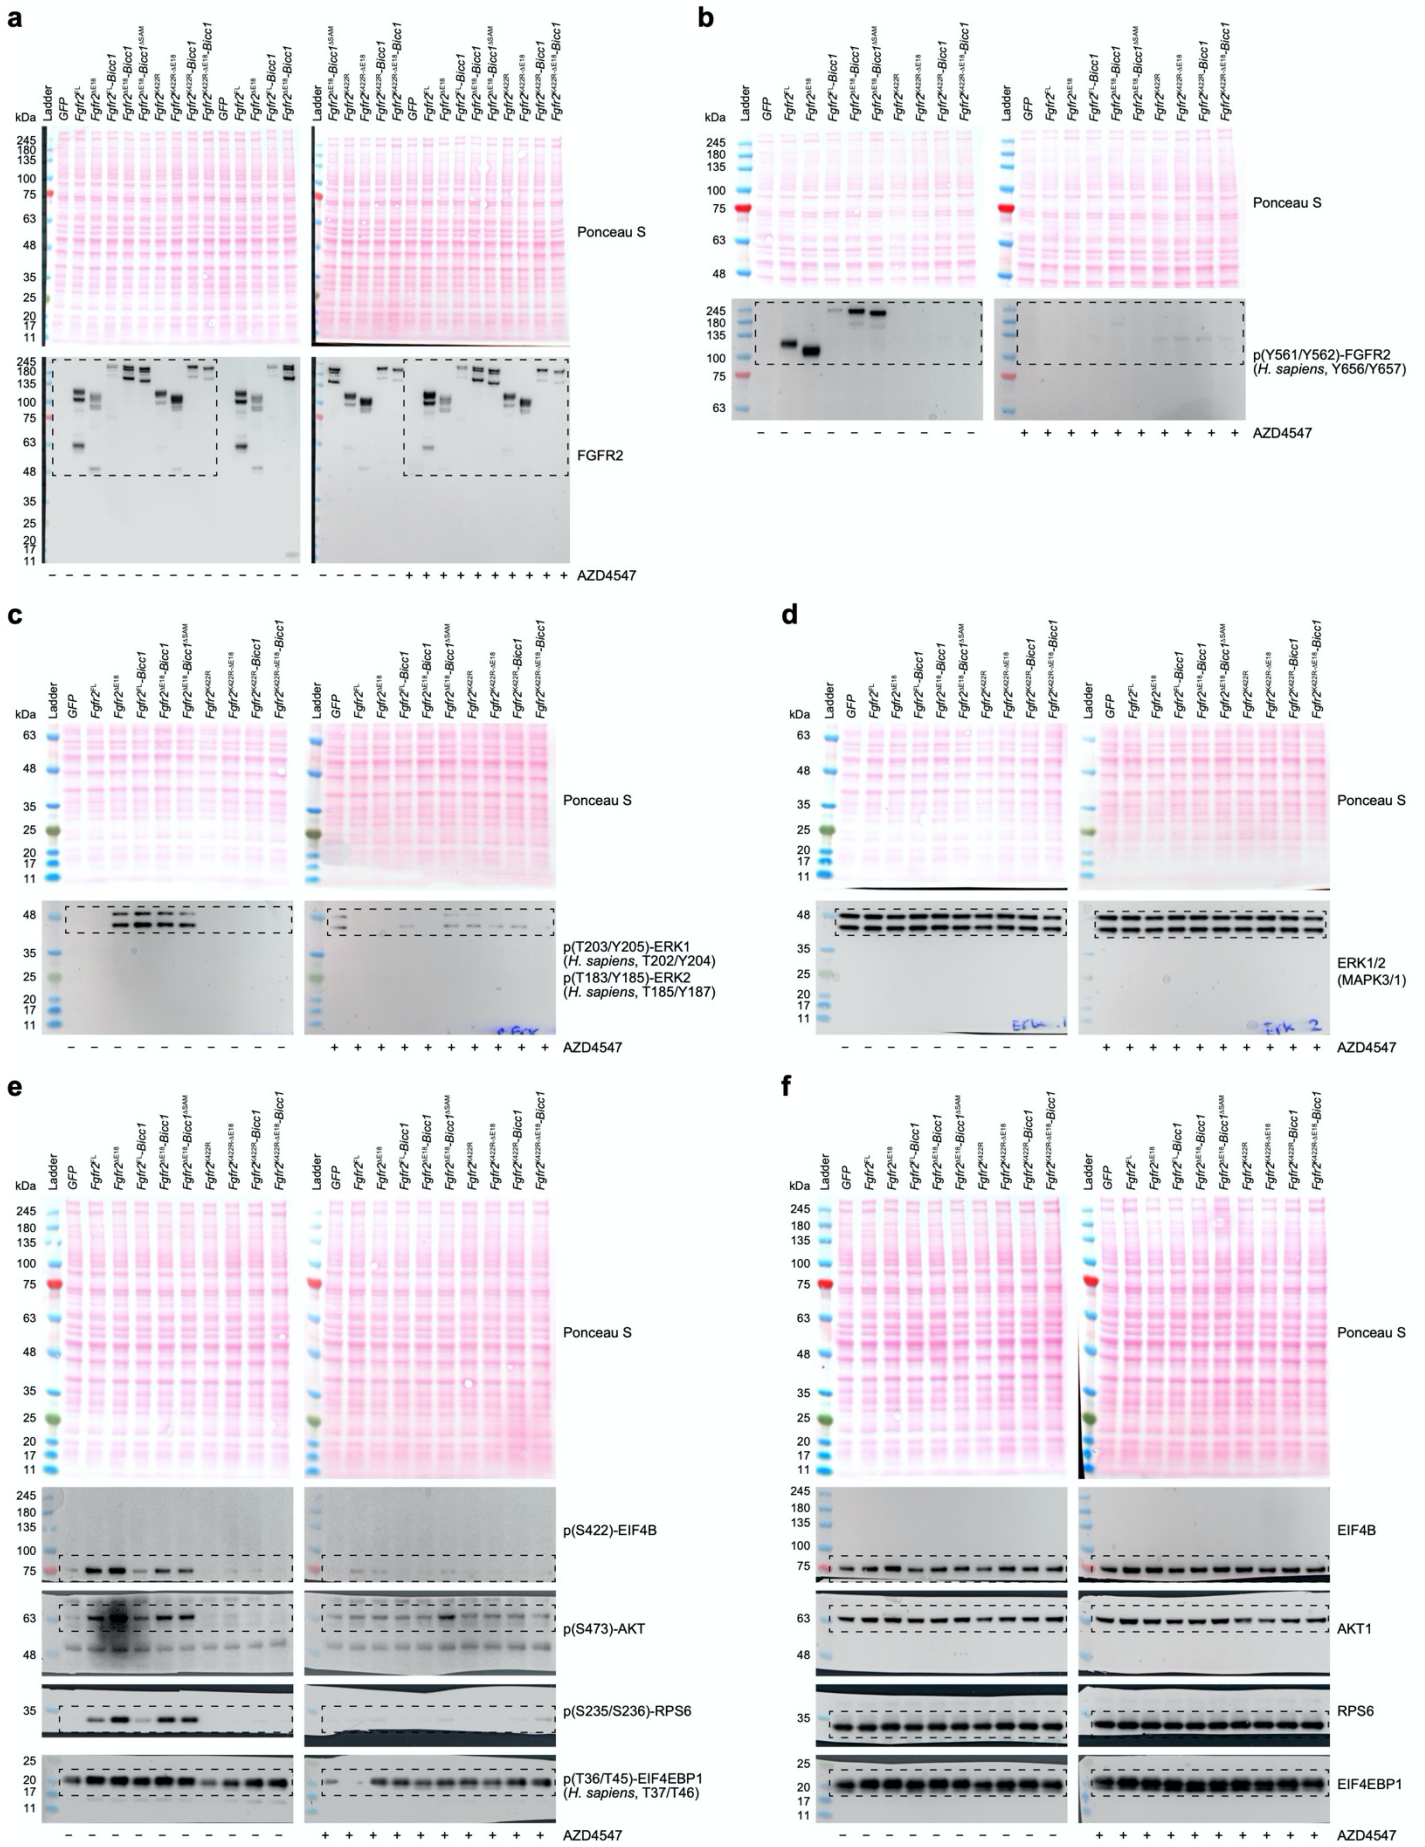

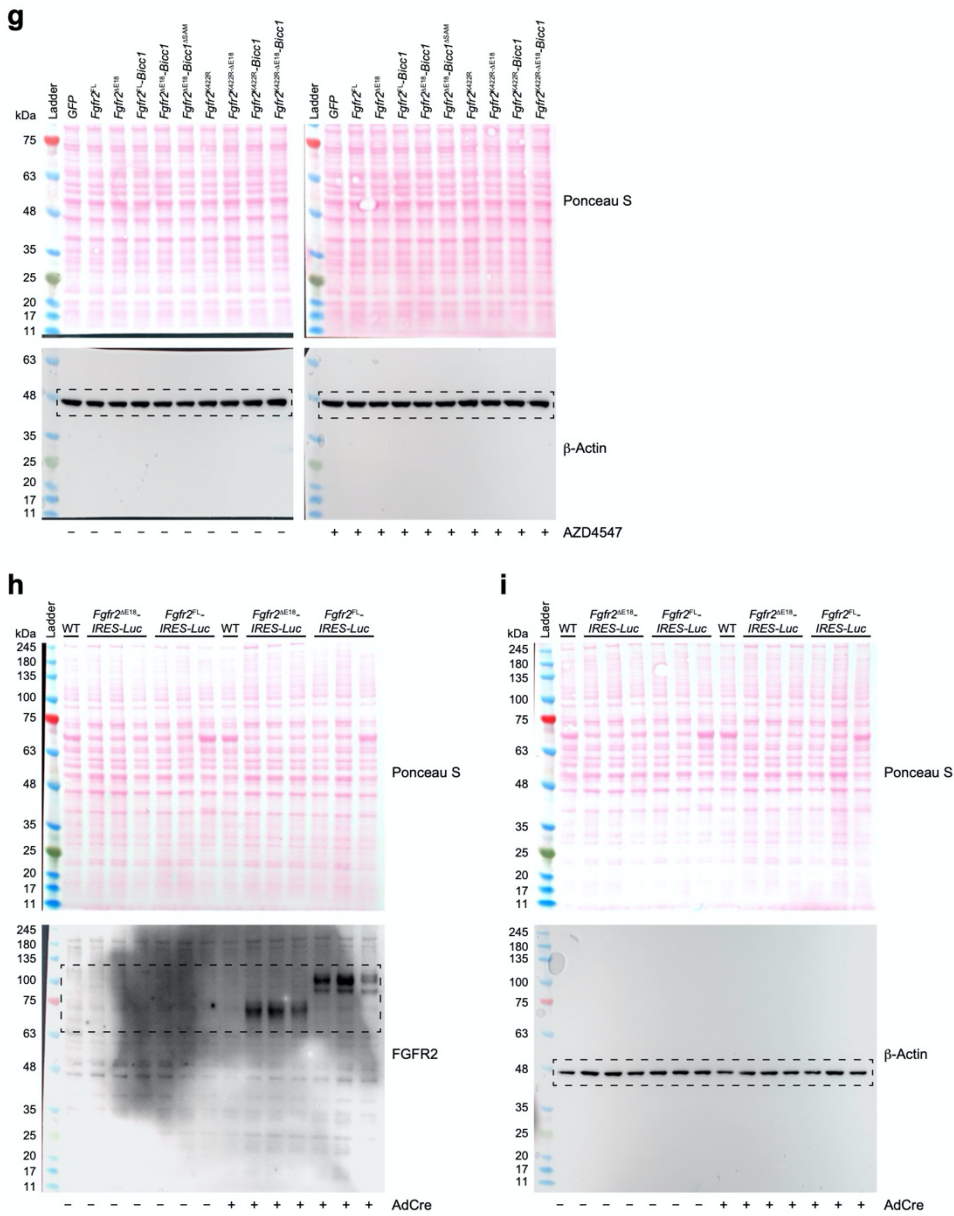

**Supplementary Figure 1. Uncropped Western blots.** **a-g**, Related to Extended Data Fig. 5g. Uncropped Western blots showing expression and phosphorylation of indicated proteins in NmuMG cells expressing *GFP* or indicated *Fgfr2* variants and treated for 3 hr with vehicle or 100 nM AZD4547. **h, i**, Related to Extended Data Fig. 7g. Uncropped Western blots showing FGFR2 and  $\beta$ -actin expression of mock-treated or AdCre-treated WT, *Fgfr2*<sup>FL</sup>-*IRES-Luc*, or *Fgfr2*<sup>AE18</sup>-*IRES-Luc* MMEC cultures. Each blot was run with a BlueEye Prestained Protein Marker and stained with Ponceau S to ensure equal loading of total protein. Blots stained with the same antibody were developed and recorded in parallel and subjected to equal post-imaging processing. Black dashed squares indicate cropped bands.

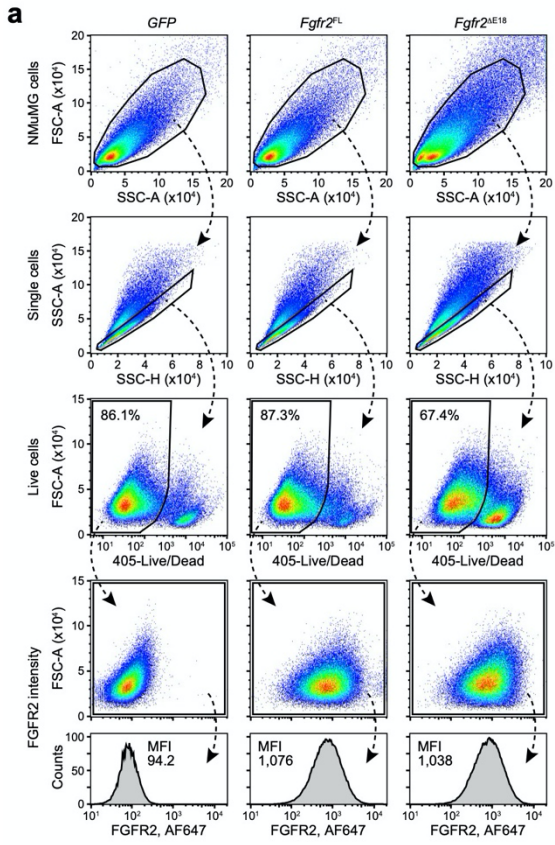

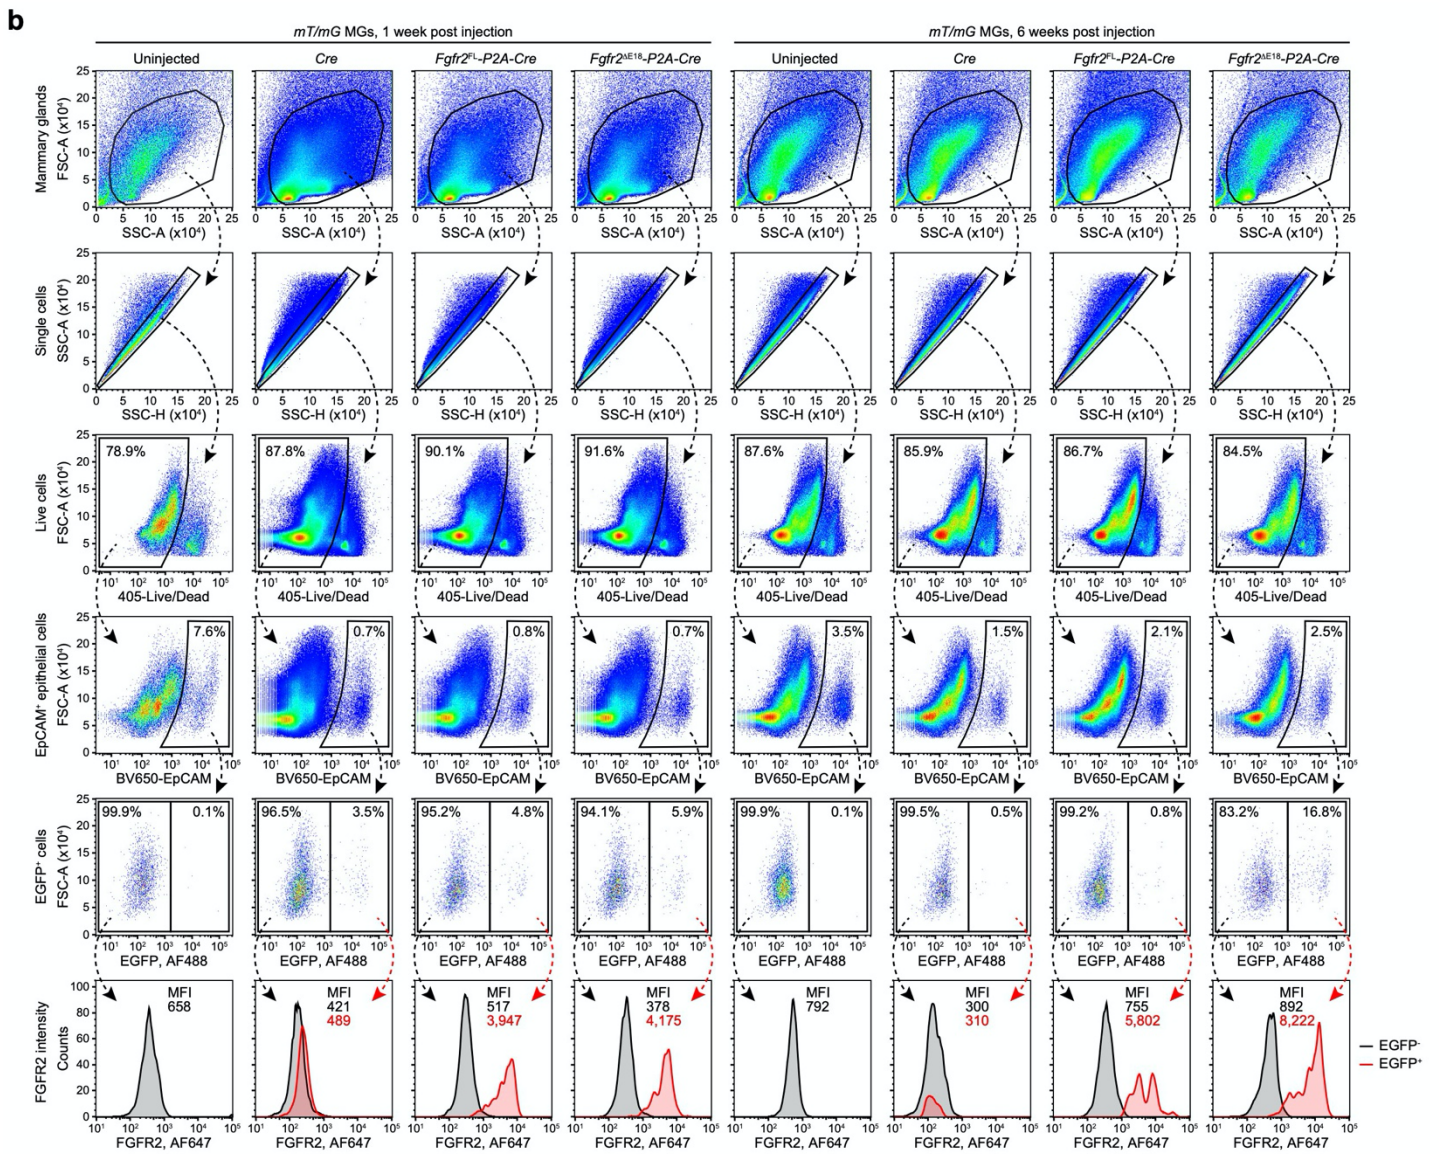

**Supplementary Figure 2. FACS gating strategies. a**, Related to Extended Data Fig. 5a. Fluorescence-activated cell sorting (FACS) gating strategy to analyse FGFR2 mean fluorescence intensity (MFI) in NmuMG cells expressing *GFP* or indicated *Fgfr2* variants. Cells were gated as follows: (i) FSC-A / SSC-A to select bulk of NmuMG cells and exclude debris events, (ii) SSC-A / SSC-H to select single cells, (iii) FSC-A / 405-Live/Dead to select live cells, and (iv) FSC-A / FGFR2, AF647 for gating to subsequently display FGFR2 intensity as histogram and measure FGFR2 MFI. **b**, Related to Extended Data Fig. 6b, c. FACS gating strategy to analyse traced EGFP<sup>+</sup> EpCAM<sup>+</sup> mammary epithelial cells and their FGFR2 MFI isolated from *Rosa26-mT/mG* female reporter mice intraductally injected with lentiviruses encoding *Cre* or indicated *Fgfr2-P2A-Cre* variants. *Cre* mediates *mT/mG* allele switching resulting in replacement of tdTomato (mT) expression by membrane-localised EGFP (mG) expression. Cells were gated as follows: (i) FSC-A / SSC-A to select bulk of mammary epithelial cell population and exclude debris events, (ii) SSC-A / SSC-H to select single cells, (iii) FSC-A / 405-Live/Dead to select live cells, (iv) FSC-A / BV650-EpCAM to select EpCAM<sup>+</sup> epithelial cells, (v) FSC-A / EGFP, AF488 to select and quantify EGFP<sup>-</sup> and EGFP<sup>+</sup> cells, and (vi) FSC-A / FGFR2, AF647 for gating (not shown) to subsequently display FGFR2 intensity as histogram and measure FGFR2 MFI of EGFP<sup>-</sup> and EGFP<sup>+</sup> cells.

**Supplementary Table 1. List of *FGFR2* REs identified in the HMF cohort.** List of *FGFR2* in-frame fusions and frame-unknown, intergenic, out-of-strand, and internal REs including BP information (genomic coordinates, corresponding genes, sequencing read orientations), CN information, and ploidy level information identified in 2,112 WGS profiles from HMF. Genomic coordinates of REs are denoted based on human reference genome GRCh37.

**Supplementary Table 2. List of *FGFR2* alterations identified in the FMI cohort.** Lists of *FGFR2* in-frame fusions and frame-unknown, intergenic, out-of-strand, and internal REs including dimerising capacity of RE partners as well as *FGFR2* E1-E17 partial amp and E1-E18 full-length amp and E18-splice-site, E18-truncating nonsense and frameshift, and missense hotspot mutations identified in diagnostic hybrid-capture panel-seq profiles from FMI (pan-cancer,  $n = 249,570$ ; BRCA,  $n = 22,380$ ). Alterations in top-30 co-altered driver genes are also disclosed. Genomic coordinates of REs are denoted based on human reference genome GRCh37. This table furthermore contains statistical details including exact  $P$  values, odds ratios, 95% confidence intervals, and FDR-adjusted  $P$  values corresponding to Fig. 3b, c and Extended Data Fig. 10b, c, e.

**Supplementary Table 3. List of samples expressing *FGFR2*<sup>ΔE18</sup> variants identified in TCGA cohort.** List of *FGFR2* in-frame fusions and out-of-frame, intergenic and out-of-strand REs including BP information, amp status, and expression level (fusion fragments per million total reads, FPPM) of each RE as well as summary list of samples expressing *FGFR2*<sup>ΔE18</sup> including REs, truncating mutations, and/or usage of E18-C3 or E18-C4, all identified in 10,344 samples from TCGA. Genomic coordinates of REs are denoted based on human reference genome GRCh38.

**Supplementary Table 4. Expression of lentiviral *FGFR2* constructs. *Sheet-1\_NMuMG*,** Expression of indicated lentiviral GFP-T2A-Puro and *Fgfr2*-T2A-Puro constructs in mouse *NmuMG* cells using RT-qPCR with primers spanning indicated cDNA segments. Expression of each cDNA segment is normalised to *Uspf1* expression and to *Fgfr2* expression (average of *Fgfr2* E5–E6 and E17–E18) in *GFP*-expressing control cells. Data are represented as mean of  $n = 3$  technical replica per group. Data represent 1 replica of 3 independent experiments. *Fgfr2*<sup>FL</sup>, full-length (FL) *Fgfr2*. *Ate1*, *Bicc1*, and *Tacc2* correspond to the top-recurrent *ATE1*, *BICC1*, and *TACC2* fusion partner genes in Extended Data Fig. 2h. *Bicc1*<sup>ASAM</sup> encodes *BICC1* lacking its SAM oligomerisation domain. *Fgfr2*<sup>K422R</sup> variants encode KD-dead *FGFR2* variants. Truncated or alternative C-termini encoded by *IGR1/IGR2*, E18-C2/C3/C4, *Fgfr2*<sup>Y674\*</sup>, *Fgfr2*<sup>T678\*</sup>, *Fgfr2*<sup>P686\*</sup>, *Fgfr2*<sup>S694\*</sup>, *Fgfr2*<sup>V702\*</sup>, *Fgfr2*<sup>Y717\*</sup>, *Fgfr2*<sup>L681fs\*6</sup>, *Fgfr2*<sup>S687fs\*3</sup>, *Fgfr2*<sup>S697fs\*4</sup>, *Fgfr2*<sup>S704fs\*22</sup> are displayed in Extended Data Fig. 2k. *Fgfr2*<sup>S156W</sup>, *Fgfr2*<sup>C287R</sup>, *Fgfr2*<sup>N454K</sup>, and *Fgfr2*<sup>K564E</sup> correspond to the human *FGFR2*<sup>S252W</sup>, *FGFR2*<sup>C382R</sup>, *FGFR2*<sup>N549K</sup>, and *FGFR2*<sup>K659E</sup> missense hotspot mutations in Extended Data Fig. 2a. ***Sheet-2\_KATO-III*,** Expression of indicated lentiviral GFP-T2A-Puro and *FGFR2*-T2A-Puro constructs in *KATO-III* cells using RT-qPCR with primers spanning indicated cDNA segments. Expression of each cDNA segment is normalised to *USF1* expression and to *FGFR2* expression (average of *FGFR2* E4–E5 and E14–E16) in non-transduced WT MCF7 cells. Data are represented as mean of  $n = 3$  technical replica per group of 1 experiment. *FGFR2*<sup>K517R</sup> variants encode KD-dead *FGFR2* variants. E4–E5 and E14–E16 primers detect endogenous *FGFR2* transcripts and *FGFR2* transcripts derived from lentiviral constructs. E1–E2 (5'-UTR), E18-C1 (3'-UTR), and E18-C3 (3'-UTR) primers specifically detect endogenous *FGFR2* transcripts. E18-C1–T2A, E17–T2A, and T2A–Puro primers specifically detect *FGFR2* transcripts derived from lentiviral constructs.

**Supplementary Table 5. List of *FGF/FGFR* alterations identified in CCLE cell lines with *FGFRi* responses.** List of *FGF/FGFR* amp status, *FGFR* missense hotspot mutations, *FGFR1-4* expression, *FGFR* composite expression, *FGFR2/3* REs, and/or usage of *FGFR2*–E18-C3 or E18-C4 in CCLE cell lines with *FGFRi* AUC values (AZD4547,  $n = 700$ ; PD173074,  $n = 484$ ).



**Supplementary Table 6. List of *FGF/FGFR* alterations identified in PDX models with Debio-1347 response.** List of *FGF/FGFR* amp status, *FGFR* missense hotspot mutations, *FGFR1-4* expression, *FGFR* composite expression, *FGFR2/3* REs, and/or usage of *FGFR2*–E18-C3 or E18-C4 in 36 CrownBio-HuPrime PDX models with Debio-1347 response data (disclosed as  $\Delta T/\Delta C$  values).

**Supplementary Table 7. *Fgfr2* GEMM cloning primer sequences.**

| Target                                                                            | Forward primer         | Reverse primer                  |
|-----------------------------------------------------------------------------------|------------------------|---------------------------------|
| <i>Fgfr2</i> variant amplification for <i>in vivo</i> shuttle vectors (FseI-PmeI) |                        |                                 |
| <i>Fgfr2</i> <sup>FL</sup>                                                        | AAAAGGCCGGCCATGGGATTAC | AAAAGTTTAAACTCATGTTTTAACACTGCC  |
| <i>Fgfr2</i> <sup>ΔE18</sup>                                                      | AAAAGGCCGGCCATGGGATTAC | AAAAGTTTAAACTCACTCATTTGGTTGTGAG |

**Supplementary Table 8. Mouse genotyping primer sequences.**

| Target                                                                                                            | Forward primer       | Reverse primer       |
|-------------------------------------------------------------------------------------------------------------------|----------------------|----------------------|
| <i>Colla1</i> <sup>fltr-invCAG-Fgfr2-FL-IRES-Luc</sup> / <i>Colla1</i> <sup>fltr-invCAG-Fgfr2-ΔE18-IRES-Luc</sup> | TGGCCAGGGATATCAACAAC | ACACCGCCTTATTTCCAAGC |
| <i>Colla1</i> wild-type locus                                                                                     | CTCGCAGTACTTCATTC    | CTGCTTGAATCCCTTTGAG  |

**Supplementary Table 9. Antibodies used.**

| Target                  | Name                                           | Provider                  | Identifier#    | Lot#        | Clone# | Dilution |
|-------------------------|------------------------------------------------|---------------------------|----------------|-------------|--------|----------|
| <b>FACS</b>             |                                                |                           |                |             |        |          |
| EpCAM                   | Rat monoclonal anti-EpCAM, BV650-conjugated    | BD Biosciences            | 740559         | 1187955     | G8.8   | 1:100    |
| FGFR2                   | Rabbit monoclonal anti-FGFR2                   | Cell Signaling Technology | 11835          | 4 and 5     | D4H9   | 1:200    |
| EGFP                    | Goat polyclonal anti-GFP                       | Abcam                     | ab6673         | GR3371856-3 | --     | 1:200    |
| Goat-IgG                | Donkey anti-goat IgG (H+L), AF488-conjugated   | Thermo Fisher Scientific  | A-11055        | 2301114     | --     | 1:400    |
| Rabbit-IgG              | Donkey anti-rabbit IgG (H+L), AF647-conjugated | Thermo Fisher Scientific  | A32795         | WA308388    | --     | 1:400    |
| <b>IHC</b>              |                                                |                           |                |             |        |          |
| MYC                     | Rabbit monoclonal anti-C-MYC                   | Abcam                     | ab32072        | GR189790-46 | Y69    | 1:4,000  |
| Cyclin D1               | Rabbit monoclonal anti-Cyclin D1               | Abcam                     | ab16663        | GR249365-2  | SP4    | 1:200    |
| E-cadherin              | Rabbit monoclonal anti-E-cadherin              | Cell Signaling Technology | 3195           | 10          | 24E10  | 1:200    |
| FGF3                    | Rabbit polyclonal anti-FGF3                    | LifeSpan BioSciences      | LS-B11923      | 53099       | --     | 1:100    |
| FGFR2                   | Rabbit monoclonal anti-FGFR2                   | Cell Signaling Technology | 11835          | 4 and 5     | D4H9   | 1:200    |
| PTEN                    | Rabbit monoclonal anti-PTEN                    | Cell Signaling Technology | 9559           | 12          | 138G6  | 1:100    |
| P53                     | Rabbit polyclonal anti-P53                     | Leica Biosystems          | NCL-L-p53-CM5p | 6070664     | --     | 1:250    |
| <b>Phospho-Tyr IP</b>   |                                                |                           |                |             |        |          |
| p-Tyr-1000              | Rabbit multi-monoclonal anti-p-Tyr mix         | Cell Signaling Technology | 8954           | 13          | --     | 1:2,000  |
| <b>Western blotting</b> |                                                |                           |                |             |        |          |
| β-Actin                 | Mouse IgG1 monoclonal anti-β-Actin             | Sigma-Aldrich             | A5441          | 127M4866V   | AC-15  | 1:10,000 |
| AKT1                    | Rabbit monoclonal anti-AKT1                    | Cell Signaling Technology | 2938           | 4           | C73H10 | 1:1,000  |
| p(S473)-AKT             | Rabbit monoclonal anti-p(S473)-AKT             | Cell Signaling Technology | 4060           | 25          | D9E    | 1:1,000  |
| EIF4B                   | Rabbit polyclonal anti-EIF4B                   | Cell Signaling Technology | 3592           | 3           | --     | 1:1,000  |
| p(S422)-EIF4B           | Rabbit polyclonal anti-p(S422)-EIF4B           | Cell Signaling Technology | 3591           | 6           | --     | 1:1,000  |
| EIF4EBP1                | Rabbit monoclonal anti-EIF4EBP1                | Cell Signaling Technology | 9644           | 10          | 53H11  | 1:1,000  |
| p(T37/T46)-EIF4EBP1     | Rabbit monoclonal anti-p(T37/T46)-EIF4EBP1     | Cell Signaling Technology | 2855           | 17          | 236B4  | 1:1,000  |
| ERK1/2                  | Rabbit monoclonal anti-ERK1/2                  | Cell Signaling Technology | 4695           | 28          | 137F5  | 1:1,000  |
| p(T202/Y204)-ERK1/2     | Rabbit polyclonal anti-p(T202/Y204)-ERK1/2     | Cell Signaling Technology | 9101           | 30 and 31   | --     | 1:1,000  |
| FGFR2                   | Rabbit monoclonal anti-FGFR2                   | Cell Signaling Technology | 11835          | 4 and 5     | D4H9   | 1:1,000  |
| p(Y653/Y654)-FGFR       | Rabbit polyclonal anti-p(Y653/Y654)-FGFR       | Cell Signaling Technology | 3471           | 8 and 12    | --     | 1:1,000  |
| RPS6                    | Rabbit monoclonal anti-RPS6                    | Cell Signaling Technology | 2217           | 10          | 5G10   | 1:1,000  |
| p(S235/S236)-RPS6       | Rabbit polyclonal anti-p(S235/S236)-RPS6       | Cell Signaling Technology | 2211           | 23          | --     | 1:1,000  |
| Mouse-IgG               | Goat anti-mouse IgG (H+L), HRP-conjugated      | Thermo Fisher Scientific  | G-21040        | 1925065     | --     | 1:20,000 |
| Rabbit-IgG              | Goat anti-rabbit IgG (H+L), HRP-conjugated     | Dako                      | P0448          | 20083037    | --     | 1:20,000 |

**Supplementary Table 10. siRNA sequences.**

| Target               | siRNA name                   | siRNA sequence        |
|----------------------|------------------------------|-----------------------|
| <i>FGFR2</i> E5      | siFGFR2 <sup>E5</sup>        | GAAAAACGGGAAGGAGTTTtt |
| <i>FGFR2</i> E9      | siFGFR2 <sup>E9</sup>        | CCTGTATGGTGGTAACAGTtt |
| <i>FGFR2</i> E15     | siFGFR2 <sup>E15</sup>       | CCCTGTTTGTAGAGTATAtt  |
| <i>FGFR2</i> E18-C1  | siFGFR2 <sup>E18-C1</sup> #1 | GCTTGGACTTAAGTAGTAtt  |
| <i>FGFR2</i> E18-C1  | siFGFR2 <sup>E18-C1</sup> #2 | GGATGTCCCAATGCACCTAtt |
| <i>FGFR2</i> E18-C3  | siFGFR2 <sup>E18-C3</sup> #1 | GCTTCATTGAGAAACTGGGtt |
| <i>FGFR2</i> E18-C3  | siFGFR2 <sup>E18-C3</sup> #2 | GGCTTCATTGAGAAACTGGtt |
| <i>FGFR2-COL14A1</i> | siFGFR2-COL14A1#1            | GAGCTACACATTGTTGTCAtt |
| <i>FGFR2-COL14A1</i> | siFGFR2-COL14A1#2            | GTGAGACTTTGGTCAAAGTtt |

**Supplementary Table 11. RT-qPCR primer sequences.**

| Target                                             | Forward primer           | Reverse primer             |
|----------------------------------------------------|--------------------------|----------------------------|
| Primers for mouse cDNA                             |                          |                            |
| <i>Fgfr2</i> E5–E6                                 | TTAAGCAGGAGCATCGCATTG    | GGCAGGTGTAGTTGCCTTTG       |
| <i>Fgfr2</i> E14–E15                               | GCCAGAAACGTGTTGGTAAC     | TTCAGGAGCCATCCACTTG        |
| <i>Fgfr2</i> E17–E18 (used for <i>SB</i> -tumours) | GGATCGAATTCTGACTCTCAC    | GGGTTCATAAGGCATGGG         |
| <i>Fgfr2</i> E17–E18 (used for cells)              | CCACATTCAAGCAGTTGGTCG    | AATACTGTTTCGAGAGGCTGGG     |
| <i>Fgfr2</i> E17– <i>T2A</i>                       | CCACATTCAAGCAGTTGGTCG    | TCGACGTCACCGCATGTTAG       |
| <i>Fgfr2</i> E18– <i>T2A</i> #1                    | TTTTTCTCCAGACCCCATGCC    | TCGACGTCACCGCATGTTAG       |
| <i>Fgfr2</i> E18– <i>T2A</i> #2                    | AATACTTGGATCTCACCAGCC    | TCGACGTCACCGCATGTTAG       |
| <i>Fgfr2</i> E17– <i>Ate1</i> E11                  | CCACATTCAAGCAGTTGGTCG    | AATGGGCACCCAGACATACG       |
| <i>Fgfr2</i> E18– <i>Ate1</i> E11                  | TTTTTCTCCAGACCCCATGCC    | AATGGGCACCCAGACATACG       |
| <i>Ate1</i> E12– <i>T2A</i>                        | GCTGGAGTATGCAAACCTCGT    | TCGACGTCACCGCATGTTAG       |
| <i>Fgfr2</i> E17– <i>Bicc1</i> E3                  | CCACATTCAAGCAGTTGGTCG    | GCGTGTGTTCTCCTCCATGA       |
| <i>Fgfr2</i> E18– <i>Bicc1</i> E3                  | TTTTTCTCCAGACCCCATGCC    | GCGTGTGTTCTCCTCCATGA       |
| <i>Bicc1</i> E19– <i>T2A</i>                       | AGCGCAAGCAGAACAAATCAAG   | TCGACGTCACCGCATGTTAG       |
| <i>Bicc1</i> E20– <i>T2A</i>                       | AAATGCTGCTGGCAATCTCAG    | TCGACGTCACCGCATGTTAG       |
| <i>Fgfr2</i> E17– <i>Tacc2</i> E15                 | CCACATTCAAGCAGTTGGTCG    | GAGACATCTGGTGGGTGAGC       |
| <i>Fgfr2</i> E18– <i>Tacc2</i> E15                 | TTTTTCTCCAGACCCCATGCC    | GAGACATCTGGTGGGTGAGC       |
| <i>Tacc2</i> E21– <i>T2A</i>                       | AAAGAACGCTGGAGCAGAAGA    | TCGACGTCACCGCATGTTAG       |
| <i>Fgfr2</i> E17– <i>IGR1</i>                      | CCACATTCAAGCAGTTGGTCG    | GAGCAGCATCCGCTGTTCT        |
| <i>IGR1</i> – <i>T2A</i>                           | GCAATTCAGATGGGCAAGAAGC   | TCGACGTCACCGCATGTTAG       |
| <i>Fgfr2</i> E17–E18-C2                            | CCACATTCAAGCAGTTGGTCG    | ATACGGTTCGAGAGGCTGAC       |
| <i>Fgfr2</i> E18-C2– <i>T2A</i>                    | CTCAGTCAGCCTCTCGAACC     | TCGACGTCACCGCATGTTAG       |
| <i>Fgfr2</i> E17–E18-C4                            | CCACATTCAAGCAGTTGGTCG    | CAGGTGAGAGGGTTACATGG       |
| <i>Fgfr2</i> E18-C4– <i>T2A</i>                    | GCCACAAGCCACCATGTAAC     | TCGACGTCACCGCATGTTAG       |
| <i>IRES</i> – <i>Luc</i>                           | CCTCGGTGCACATGCTTTAC     | CGCTGGGCCCTTCTTAATGT       |
| <i>Hprt</i>                                        | CTGGTGAAAAGACCTCTCG      | TGAAGTACTCATTATAGTCAAGGGCA |
| <i>Usp1</i>                                        | CATCAGTGGTTACCCTGCCAC    | ATCGTCACTGGTGAAAGCTCC      |
| Primers for human cDNA                             |                          |                            |
| <i>FGFR2</i> E1–E2 (5'-UTR)                        | GAGGAGCGTTGCCATTCAAG     | CACTTCCTCTACGGGCATGG       |
| <i>FGFR2</i> E4–E5 (CDS)                           | TGGTGCGGAAGATTTTGTGACG   | AAACTTGACAGTGTGGCCG        |
| <i>FGFR2</i> E14–E16 (CDS)                         | ACAAAAAGACCACCAATGGGC    | TCCCACATTAACACCCCGAAG      |
| <i>FGFR2</i> E17–E18-C1 (3'-UTR)                   | CAACCAATGAGGAATACTTGGACC | ACTGAGGAAGGCATGGTTTCG      |
| <i>FGFR2</i> E17–E18-C3 (3'-UTR)                   | CTCCCAGAGACCAACGTTCA     | CCCAGTTTCTCAATGAAGCCATAA   |
| <i>FGFR2</i> E17– <i>COL14A1</i> E34               | CCAGAGACCAACGTTCAAGC     | TGACCAAAGTCTCACTGACAACA    |
| <i>COL14A1</i> E37–E41                             | CTGGCCAGCCTGGATATTGT     | CAGCTCATCTTGGACAGGGG       |
| <i>FGFR2</i> E18-C1– <i>T2A</i>                    | TTTTTCTCCAGACCCCATGCC    | TCGACGTCACCGCATGTTAG       |
| <i>FGFR2</i> E17– <i>T2A</i>                       | TCCCAGAGACCAACGTTCAAG    | TCGACGTCACCGCATGTTAG       |
| <i>USF1</i>                                        | ATGGAGAGCACCAAGTCTGG     | TGGTTACTCTGCCGAAGCTC       |
| Primers for mouse/human cDNA                       |                          |                            |
| <i>GFP</i> – <i>T2A</i>                            | GTCCCTGCTGGAGTTCGTGAC    | TCGACGTCACCGCATGTTAG       |
| <i>T2A</i> – <i>Puro</i>                           | AGGGCAGAGGAAGTCTGCTA     | GGGGTAGTCGGCGAACC          |
